# Supplementary material
Source: PubMed Central journal article supplement (PMC7436439)
Supplement: BJH-190-e268-s001.pdf [file BJH-190-e268-s001.pdf]

**Supplementary Table SI.** Data from 101 worldwide nations.

| Nation                           | Total confirmed cases | Total population (thousands) | Cases per 100,000 population | Total deaths | Case fatality (%) | Blood-group O-Rh(+) (%) | Blood-group A-Rh(+) (%) | Blood-group B-Rh(+) (%) | Blood-group AB-Rh(+) (%) |
|----------------------------------|-----------------------|------------------------------|------------------------------|--------------|-------------------|-------------------------|-------------------------|-------------------------|--------------------------|
|                                  | 25/6/2020*            | 2018†                        |                              | 25/6/2020*   |                   |                         |                         |                         |                          |
| Albania                          | 2,192                 | 2,883                        | 76.0                         | 48           | 2.2               | 28.85                   | 34.45                   | 15.66                   | 10.29                    |
| Argentina                        | 47,216                | 44,361                       | 106.4                        | 1,085        | 2.3               | 45.40                   | 34.26                   | 8.59                    | 2.64                     |
| Armenia                          | 22,488                | 2,952                        | 761.8                        | 397          | 1.8               | 29.00                   | 46.30                   | 12.00                   | 5.60                     |
| Australia                        | 7,521                 | 24,898                       | 30.2                         | 103          | 1.4               | 40.00                   | 31.00                   | 8.00                    | 2.00                     |
| Austria                          | 17,384                | 8,891                        | 195.5                        | 693          | 4.0               | 30.00                   | 33.00                   | 12.00                   | 6.00                     |
| Bahrain                          | 23,570                | 1,569                        | 1502.2                       | 69           | 0.3               | 48.48                   | 19.35                   | 22.61                   | 3.67                     |
| Bangladesh                       | 122,660               | 161,377                      | 76.0                         | 1,582        | 1.3               | 31.18                   | 21.44                   | 34.58                   | 8.85                     |
| Belgium                          | 60,898                | 11,482                       | 530.4                        | 9,722        | 16.0              | 38.00                   | 34.00                   | 8.50                    | 4.10                     |
| Bolivia (Plurinational State of) | 26,389                | 11,353                       | 232.4                        | 846          | 3.2               | 51.62                   | 29.45                   | 10.11                   | 1.15                     |
| Bosnia and Herzegovina           | 3,675                 | 3,324                        | 110.6                        | 172          | 4.7               | 31.00                   | 36.00                   | 12.00                   | 6.00                     |
| Brazil                           | 1,145,906             | 209,469                      | 547.1                        | 52,645       | 4.6               | 36.00                   | 34.00                   | 8.00                    | 2.50                     |
| Bulgaria                         | 4,242                 | 7,052                        | 60.2                         | 209          | 4.9               | 28.00                   | 37.00                   | 13.00                   | 7.00                     |
| Cambodia                         | 130                   | 16,250                       | 0.8                          | 0            | 0.0               | 46.70                   | 27.20                   | 18.50                   | 4.90                     |
| Cameroon                         | 12,270                | 25,216                       | 48.7                         | 313          | 2.6               | 42.80                   | 38.80                   | 12.00                   | 3.30                     |
| Canada                           | 101,963               | 37,075                       | 275.0                        | 8,454        | 8.3               | 39.00                   | 36.00                   | 7.60                    | 2.50                     |
| Chile                            | 254,416               | 18,729                       | 1358.4                       | 431          | 0.2               | 85.60                   | 8.70                    | 3.35                    | 0.99                     |
| China                            | 85,119                | 1,435,651                    | 5.9                          | 4,647        | 5.5               | 47.70                   | 27.80                   | 18.90                   | 5.00                     |
| Colombia                         | 73,572                | 49,661                       | 148.1                        | 2,404        | 3.3               | 61.30                   | 26.11                   | 2.28                    | 1.47                     |
| Croatia                          | 2,388                 | 4,156                        | 57.5                         | 107          | 4.5               | 29.00                   | 36.00                   | 15.00                   | 5.00                     |
| Cuba                             | 2,319                 | 11,338                       | 20.5                         | 85           | 3.7               | 45.55                   | 32.77                   | 9.47                    | 2.35                     |
| Cyprus                           | 991                   | 1,189                        | 83.3                         | 19           | 1.9               | 35.22                   | 40.35                   | 11.11                   | 4.72                     |
| Czechia                          | 10,777                | 10,666                       | 101.0                        | 343          | 3.2               | 27.00                   | 36.00                   | 15.00                   | 7.00                     |
| Democratic Republic of the Congo | 6,212                 | 5,244                        | 118.5                        | 141          | 2.3               | 59.50                   | 21.30                   | 15.20                   | 2.40                     |
| Denmark                          | 12,615                | 5,752                        | 219.3                        | 603          | 4.8               | 35.00                   | 37.00                   | 8.00                    | 4.00                     |
| Dominican Republic               | 28,631                | 10,627                       | 269.4                        | 691          | 2.4               | 46.20                   | 26.40                   | 16.90                   | 3.10                     |
| Ecuador                          | 52,334                | 17,084                       | 306.3                        | 309          | 0.6               | 75.00                   | 14.00                   | 7.10                    | 0.50                     |
| Egypt                            | 59,561                | 98,424                       | 60.5                         | 2,450        | 4.1               | 52.00                   | 24.00                   | 12.40                   | 3.80                     |
| El Salvador                      | 5,150                 | 6,421                        | 80.2                         | 119          | 2.3               | 62.00                   | 23.00                   | 11.00                   | 1.00                     |
| Estonia                          | 1,983                 | 1,323                        | 149.9                        | 69           | 3.5               | 29.50                   | 30.80                   | 20.79                   | 6.40                     |
| Ethiopia                         | 5,034                 | 109,224                      | 4.6                          | 78           | 1.5               | 39.00                   | 28.00                   | 21.00                   | 5.00                     |
| Fiji                             | 18                    | 883                          | 2.0                          | 0            | 0.0               | 43.00                   | 33.30                   | 16.50                   | 4.80                     |
| Finland                          | 7,167                 | 5,523                        | 129.8                        | 327          | 4.6               | 27.00                   | 38.00                   | 15.00                   | 7.00                     |
| France                           | 155,087               | 64,991                       | 238.6                        | 29,655       | 19.1              | 36.00                   | 37.00                   | 9.00                    | 3.00                     |
| Germany                          | 192,079               | 83,124                       | 231.1                        | 8,927        | 4.6               | 35.00                   | 37.00                   | 9.00                    | 4.00                     |
| Ghana                            | 15,013                | 29,767                       | 50.4                         | 95           | 0.6               | 53.80                   | 17.60                   | 18.30                   | 2.80                     |
| Greece                           | 3,310                 | 10,522                       | 31.5                         | 190          | 5.7               | 37.40                   | 32.90                   | 11.00                   | 3.70                     |
| Guinea                           | 5,174                 | 12,414                       | 41.7                         | 29           | 0.6               | 46.88                   | 21.64                   | 22.86                   | 4.52                     |
| Honduras                         | 13,943                | 9,588                        | 145.4                        | 405          | 2.9               | 57.50                   | 27.00                   | 7.80                    | 2.50                     |
| Hungary                          | 4,114                 | 9,708                        | 42.4                         | 576          | 14.0              | 27.00                   | 33.00                   | 16.00                   | 8.00                     |
| Iceland                          | 1,827                 | 337                          | 542.1                        | 10           | 0.5               | 47.60                   | 26.40                   | 9.30                    | 1.60                     |
| India                            | 473,105               | 1,352,642                    | 35.0                         | 14,894       | 3.1               | 27.85                   | 20.80                   | 38.13                   | 8.93                     |
| Indonesia                        | 49,009                | 267,671                      | 18.3                         | 2,573        | 5.3               | 36.82                   | 25.87                   | 28.85                   | 7.96                     |
| Iran (Islamic Republic of)       | 212,501               | 81,800                       | 259.8                        | 9,996        | 4.7               | 33.50                   | 27.00                   | 22.20                   | 7.00                     |
| Iraq                             | 36,702                | 38,434                       | 95.5                         | 1,330        | 3.6               | 32.20                   | 25.00                   | 25.60                   | 7.40                     |
| Ireland                          | 25,396                | 4,819                        | 527.0                        | 1,726        | 6.8               | 47.00                   | 26.00                   | 9.00                    | 2.00                     |
| Israel                           | 21,597                | 8,382                        | 257.7                        | 308          | 1.4               | 32.00                   | 34.00                   | 17.00                   | 7.00                     |
| Italy                            | 239,410               | 60,627                       | 394.9                        | 34,644       | 14.5              | 40.00                   | 36.00                   | 7.50                    | 2.50                     |

|                                    |           |         |       |         |      |       |       |       |      |
|------------------------------------|-----------|---------|-------|---------|------|-------|-------|-------|------|
| Jamaica                            | 670       | 2,935   | 22.8  | 10      | 1.5  | 47.00 | 23.00 | 20.00 | 3.00 |
| Japan                              | 18,110    | 127,202 | 14.2  | 968     | 5.3  | 29.90 | 39.80 | 19.90 | 9.90 |
| Kazakhstan                         | 19,285    | 18,320  | 105.3 | 136     | 0.7  | 30.70 | 29.80 | 24.20 | 8.30 |
| Kenya                              | 5,206     | 51,393  | 10.1  | 130     | 2.5  | 45.60 | 25.20 | 21.10 | 4.20 |
| Latvia                             | 1,111     | 1,928   | 57.6  | 30      | 2.7  | 30.60 | 31.00 | 17.00 | 6.00 |
| Lebanon                            | 1,644     | 6,859   | 24.0  | 33      | 2.0  | 38.40 | 32.30 | 9.40  | 3.20 |
| Libya                              | 639       | 6,679   | 9.6   | 18      | 2.8  | 42.64 | 28.86 | 11.16 | 4.50 |
| Lithuania                          | 1,804     | 2,801   | 64.4  | 78      | 4.3  | 36.00 | 33.00 | 11.00 | 4.00 |
| Luxembourg                         | 4,140     | 604     | 685.4 | 110     | 2.7  | 35.00 | 37.00 | 9.00  | 4.00 |
| Malaysia                           | 8,596     | 31,528  | 27.3  | 121     | 1.4  | 34.32 | 30.35 | 27.36 | 7.46 |
| Mauritania                         | 3,292     | 4,403   | 74.8  | 114     | 3.5  | 46.30 | 26.68 | 17.46 | 3.85 |
| Mauritius                          | 341       | 1,267   | 26.9  | 10      | 2.9  | 38.30 | 26.00 | 25.00 | 6.70 |
| Mexico                             | 191,410   | 126,191 | 151.7 | 23,377  | 12.2 | 55.79 | 29.90 | 8.00  | 1.63 |
| Mongolia                           | 215       | 3,170   | 6.8   | 0       | 0.0  | 56.40 | 27.70 | 10.90 | 4.96 |
| Morocco                            | 10,907    | 36,029  | 30.3  | 216     | 2.0  | 42.30 | 29.80 | 14.30 | 4.10 |
| Myanmar                            | 293       | 53,708  | 0.5   | 6       | 2.0  | 35.70 | 23.80 | 32.70 | 6.95 |
| Nepal                              | 10,728    | 28,096  | 38.2  | 24      | 0.2  | 35.20 | 28.30 | 27.10 | 8.60 |
| Netherlands                        | 49,804    | 17,060  | 291.9 | 6,097   | 12.2 | 39.50 | 35.00 | 6.70  | 2.50 |
| New Zealand                        | 1,169     | 4,743   | 24.6  | 22      | 1.9  | 38.00 | 32.00 | 9.00  | 3.00 |
| Nigeria                            | 22,020    | 195,875 | 11.2  | 542     | 2.5  | 51.30 | 22.40 | 20.70 | 2.60 |
| North Macedonia                    | 5,450     | 2,083   | 261.6 | 259     | 4.8  | 29.36 | 38.45 | 13.08 | 6.54 |
| Norway                             | 8,777     | 5,338   | 164.4 | 249     | 2.8  | 34.00 | 42.50 | 6.80  | 3.40 |
| Pakistan                           | 192,970   | 212,228 | 90.9  | 3,903   | 2.0  | 24.63 | 20.60 | 34.43 | 9.52 |
| Papua New Guinea                   | 10        | 8,606   | 0.1   | 0       | 0.0  | 48.00 | 37.20 | 9.60  | 2.80 |
| Peru                               | 260,810   | 31,989  | 815.3 | 8,404   | 3.2  | 70.00 | 18.40 | 7.80  | 1.60 |
| Philippines                        | 32,295    | 106,651 | 30.3  | 1,204   | 3.7  | 36.90 | 28.90 | 26.90 | 6.97 |
| Poland                             | 32,821    | 37,922  | 86.5  | 1,396   | 4.3  | 26.60 | 31.26 | 15.73 | 6.75 |
| Portugal                           | 40,104    | 10,256  | 391.0 | 1,543   | 3.8  | 36.20 | 39.80 | 6.60  | 2.90 |
| Republic of Korea                  | 12,563    | 51,172  | 24.6  | 282     | 2.2  | 36.60 | 32.80 | 21.00 | 9.00 |
| Republic of Moldova                | 15,078    | 4,052   | 372.1 | 502     | 3.3  | 28.50 | 31.80 | 17.60 | 7.00 |
| Romania                            | 24,826    | 19,506  | 127.3 | 1,555   | 6.3  | 28.00 | 37.00 | 14.00 | 7.00 |
| Russian Federation                 | 613,994   | 145,734 | 421.3 | 8,605   | 1.4  | 46.00 | 31.00 | 9.00  | 2.10 |
| Saudi Arabia                       | 167,267   | 33,703  | 496.3 | 1,387   | 0.8  | 48.00 | 24.00 | 17.00 | 4.00 |
| Serbia                             | 13,235    | 8,803   | 150.3 | 263     | 2.0  | 31.92 | 35.28 | 12.60 | 4.20 |
| Singapore                          | 42,623    | 5,758   | 740.2 | 26      | 0.1  | 43.60 | 23.90 | 24.40 | 6.00 |
| Slovakia                           | 1,607     | 5,453   | 29.5  | 28      | 1.7  | 27.20 | 35.70 | 15.30 | 6.80 |
| Slovenia                           | 1,541     | 2,078   | 74.2  | 111     | 7.2  | 31.00 | 33.00 | 12.00 | 6.00 |
| South Africa                       | 111,796   | 57,793  | 193.4 | 2,205   | 2.0  | 39.00 | 32.00 | 12.00 | 3.00 |
| Spain                              | 247,086   | 46,693  | 529.2 | 28,327  | 11.5 | 36.00 | 34.00 | 8.00  | 2.50 |
| Sudan                              | 1,930     | 41,802  | 4.6   | 36      | 1.9  | 48.00 | 27.70 | 15.20 | 2.80 |
| Sweden                             | 62,324    | 9,972   | 625.0 | 5,209   | 8.4  | 32.00 | 37.00 | 10.00 | 5.00 |
| Switzerland                        | 31,293    | 8,526   | 367.0 | 1,681   | 5.4  | 26.00 | 37.00 | 13.00 | 7.00 |
| Syrian Arab Republic               | 231       | 16,945  | 1.4   | 7       | 3.0  | 43.00 | 30.00 | 14.00 | 3.70 |
| Thailand                           | 3,158     | 69,428  | 4.5   | 58      | 1.8  | 40.80 | 16.90 | 36.80 | 4.97 |
| Turkey                             | 191,657   | 82,340  | 232.8 | 5,025   | 2.6  | 29.80 | 37.80 | 14.20 | 7.20 |
| Uganda                             | 805       | 42,729  | 1.9   | 0       | 0.0  | 43.70 | 39.00 | 10.70 | 3.90 |
| Ukraine                            | 40,008    | 44,246  | 90.4  | 1,067   | 2.7  | 32.00 | 34.00 | 15.00 | 5.00 |
| United Arab Emirates               | 46,133    | 9,631   | 479.0 | 307     | 0.7  | 44.10 | 21.90 | 20.80 | 4.30 |
| United Kingdom                     | 306,866   | 67,142  | 457.0 | 43,081  | 14.0 | 37.00 | 35.00 | 8.00  | 3.00 |
| United States of America           | 2,329,463 | 327,096 | 712.2 | 120,955 | 5.2  | 37.40 | 35.70 | 8.50  | 3.40 |
| Venezuela (Bolivarian Republic of) | 4,186     | 28,887  | 14.5  | 35      | 0.8  | 58.50 | 28.30 | 5.30  | 1.80 |
| Viet Nam                           | 352       | 95,546  | 0.4   | 0       | 0.0  | 41.70 | 21.90 | 30.80 | 4.98 |

|        |       |        |     |     |      |       |       |       |      |
|--------|-------|--------|-----|-----|------|-------|-------|-------|------|
| Yemen  | 1,019 | 28,499 | 3.6 | 275 | 27.0 | 47.84 | 27.50 | 15.32 | 2.14 |
| Zambia | 1,489 | 17,352 | 8.6 | 18  | 1.2  | 63.30 | 18.50 | 14.60 | 0.99 |

---

**Supplementary Table S1.** (Continued)

| Nation                                 | Population<br>ages 0-14<br>(%) | Population<br>ages ≥65<br>(%) | Hypertension<br>(%) | Obesity<br>(%) | Diabetes<br>(%) | Tobacco-use<br>(%) | Total pure-alcohol<br>consumption<br>(L/capita) | Life<br>expectancy<br>at birth<br>(years) |
|----------------------------------------|--------------------------------|-------------------------------|---------------------|----------------|-----------------|--------------------|-------------------------------------------------|-------------------------------------------|
|                                        | 2018‡                          | 2018‡                         | 2015†               | 2016†          | 2019‡           | 2018†              | 2018†                                           | 2016†                                     |
| Albania                                | 18                             | 14                            | 29.0                | 21.7           | 9.0             | 29.2               | 7.2                                             | 76.4                                      |
| Argentina                              | 25                             | 11                            | 22.6                | 28.3           | 5.9             | 21.8               | 9.7                                             | 76.9                                      |
| Armenia                                | 21                             | 11                            | 25.5                | 20.2           | 6.1             | 26.7               | 5.5                                             | 74.8                                      |
| Australia                              | 19                             | 16                            | 15.2                | 29.0           | 5.6             | 16.2               | 10.5                                            | 82.9                                      |
| Austria                                | 14                             | 19                            | 21.0                | 20.1           | 6.6             | 29.1               | 12.0                                            | 81.8                                      |
| Bahrain                                | 19                             | 2                             | 21.4                | 29.8           | 15.6            | 25.1               | 1.1                                             | 79.1                                      |
| Bangladesh                             | 28                             | 5                             | 24.7                | 3.6            | 9.2             | 39.1               | 0.0                                             | 72.7                                      |
| Belgium                                | 17                             | 19                            | 17.5                | 22.1           | 4.6             | 25.0               | 11.1                                            | 81.1                                      |
| Bolivia<br>(Plurinational<br>State of) | 31                             | 7                             | 17.9                | 20.2           | 6.8             | N/A                | 4.4                                             | 71.5                                      |
| Bosnia and<br>Herzegovina              | 15                             | 16                            | 30.8                | 17.9           | 9.0             | 38.3               | 7.1                                             | 77.3                                      |
| Brazil                                 | 21                             | 9                             | 23.3                | 22.1           | 10.4            | 16.5               | 7.4                                             | 75.1                                      |
| Bulgaria                               | 15                             | 21                            | 28.4                | 25.0           | 6.0             | 38.9               | 12.7                                            | 74.9                                      |
| Cambodia                               | 31                             | 5                             | 26.1                | 3.9            | 6.4             | 21.8               | 6.6                                             | 69.4                                      |
| Cameroon                               | 43                             | 3                             | 24.8                | 11.4           | 6.0             | 9.3                | 5.6                                             | 58.1                                      |
| Canada                                 | 16                             | 17                            | 13.2                | 29.4           | 7.6             | 17.5               | 8.9                                             | 82.8                                      |
| Chile                                  | 20                             | 12                            | 20.9                | 28.0           | 8.6             | 44.7               | 9.1                                             | 79.5                                      |
| China                                  | 18                             | 11                            | 19.2                | 6.2            | 9.2             | 24.7               | 7.0                                             | 76.4                                      |
| Colombia                               | 23                             | 8                             | 19.2                | 22.3           | 7.4             | 7.9                | 5.7                                             | 75.1                                      |
| Croatia                                | 15                             | 20                            | 32.4                | 24.4           | 5.4             | 36.6               | 9.2                                             | 78.2                                      |
| Cuba                                   | 16                             | 15                            | 19.0                | 24.6           | 9.6             | 27.1               | 5.8                                             | 79.0                                      |
| Cyprus                                 | 17                             | 14                            | 19.8                | 21.8           | 9.0             | 36.7               | 10.8                                            | 80.7                                      |
| Czechia                                | 16                             | 19                            | 27.9                | 26.0           | 7.0             | 31.5               | 14.4                                            | 79.1                                      |
| Democratic<br>Republic of the<br>Congo | 42                             | 3                             | 26.2                | 6.7            | 6.0             | 16.1               | 9.3                                             | 64.3                                      |
| Denmark                                | 16                             | 20                            | 20.6                | 19.7           | 8.3             | 18.6               | 10.3                                            | 81.2                                      |
| Dominican<br>Republic                  | 28                             | 7                             | 21.5                | 27.6           | 8.6             | 9.4                | 6.7                                             | 73.5                                      |
| Ecuador                                | 28                             | 7                             | 17.9                | 19.9           | 5.5             | N/A                | 4.2                                             | 76.5                                      |
| Egypt                                  | 34                             | 5                             | 25.0                | 32.0           | 17.2            | 21.4               | 0.4                                             | 70.5                                      |
| El Salvador                            | 27                             | 8                             | 18.7                | 24.6           | 8.8             | 12.7               | 3.9                                             | 73.7                                      |
| Estonia                                | 16                             | 20                            | 27.4                | 21.2           | 4.2             | 30.5               | 9.2                                             | 77.8                                      |
| Ethiopia                               | 41                             | 4                             | 30.3                | 4.5            | 4.3             | 4.6                | 2.4                                             | 65.5                                      |
| Fiji                                   | 30                             | 5                             | 21.7                | 30.2           | 14.7            | 26.7               | 3.3                                             | 69.9                                      |
| Finland                                | 16                             | 22                            | 19.4                | 22.2           | 5.6             | 19.7               | 10.8                                            | 81.4                                      |
| France                                 | 18                             | 20                            | 22.0                | 21.6           | 4.8             | 34.6               | 12.3                                            | 82.9                                      |
| Germany                                | 14                             | 21                            | 19.9                | 22.3           | 10.4            | 28.0               | 12.9                                            | 80.9                                      |
| Ghana                                  | 38                             | 3                             | 23.7                | 10.9           | 2.5             | 3.7                | 2.8                                             | 63.4                                      |
| Greece                                 | 14                             | 22                            | 19.1                | 24.9           | 4.7             | 39.1               | 10.2                                            | 81.1                                      |
| Guinea                                 | 44                             | 3                             | 30.3                | 7.7            | 2.4             | N/A                | 1.1                                             | 59.8                                      |
| Honduras                               | 32                             | 5                             | 21.4                | 21.4           | 7.3             | N/A                | 3.8                                             | 75.2                                      |
| Hungary                                | 14                             | 19                            | 30.0                | 26.4           | 6.9             | 30.6               | 11.3                                            | 76.0                                      |
| Iceland                                | 20                             | 15                            | 19.7                | 21.9           | 5.8             | 13.8               | 9.1                                             | 82.4                                      |
| India                                  | 27                             | 6                             | 25.8                | 3.9            | 10.4            | 27.0               | 5.5                                             | 68.8                                      |
| Indonesia                              | 27                             | 6                             | 23.8                | 6.9            | 6.3             | 37.9               | 0.6                                             | 69.3                                      |
| Iran (Islamic<br>Republic of)          | 24                             | 6                             | 19.7                | 25.8           | 9.6             | 14.0               | 1.0                                             | 75.7                                      |
| Iraq                                   | 38                             | 3                             | 25.2                | 30.4           | 8.8             | 22.2               | 0.4                                             | 69.9                                      |
| Ireland                                | 21                             | 14                            | 19.7                | 25.3           | 3.2             | 23.6               | 12.9                                            | 81.5                                      |
| Israel                                 | 28                             | 12                            | 16.6                | 26.1           | 9.7             | 25.5               | 4.2                                             | 82.3                                      |
| Italy                                  | 13                             | 23                            | 21.2                | 19.9           | 5.0             | 23.4               | 7.8                                             | 82.7                                      |

|                                    |    |    |      |      |      |      |      |      |
|------------------------------------|----|----|------|------|------|------|------|------|
| Jamaica                            | 24 | 9  | 21.8 | 24.7 | 11.3 | 11.0 | 4.2  | 76.0 |
| Japan                              | 13 | 28 | 17.6 | 4.3  | 5.6  | 21.9 | 8.0  | 84.2 |
| Kazakhstan                         | 28 | 7  | 27.1 | 21.0 | 6.1  | 24.4 | 4.8  | 71.1 |
| Kenya                              | 40 | 2  | 26.7 | 7.1  | 3.1  | 11.8 | 2.8  | 66.7 |
| Latvia                             | 16 | 20 | 29.4 | 23.6 | 5.0  | 36.7 | 12.8 | 75.1 |
| Lebanon                            | 26 | 7  | 20.7 | 32.0 | 11.2 | 42.6 | 1.7  | 76.3 |
| Libya                              | 28 | 4  | 23.7 | 32.5 | 10.2 | N/A  | 0.1  | 71.9 |
| Lithuania                          | 15 | 20 | 29.3 | 26.3 | 3.8  | 27.1 | 13.2 | 75.0 |
| Luxembourg                         | 16 | 14 | 21.9 | 22.6 | 5.0  | 21.7 | 12.9 | 82.5 |
| Malaysia                           | 24 | 7  | 22.9 | 15.6 | 16.7 | 21.8 | 0.9  | 75.3 |
| Mauritania                         | 40 | 3  | 31.7 | 12.7 | 7.1  | N/A  | 0.1  | 63.9 |
| Mauritius                          | 18 | 11 | 25.0 | 10.8 | 22.0 | 26.9 | 4.3  | 74.8 |
| Mexico                             | 27 | 7  | 19.7 | 28.9 | 13.5 | 13.9 | 5.0  | 76.6 |
| Mongolia                           | 30 | 4  | 29.0 | 20.6 | 4.7  | 27.6 | 8.2  | 69.8 |
| Morocco                            | 27 | 7  | 26.1 | 26.1 | 7.0  | 14.7 | 0.7  | 76.0 |
| Myanmar                            | 26 | 6  | 24.6 | 5.8  | 3.9  | 45.5 | 5.1  | 66.8 |
| Nepal                              | 30 | 6  | 29.4 | 4.1  | 7.2  | 31.9 | 2.1  | 70.2 |
| Netherlands                        | 16 | 19 | 18.7 | 20.4 | 5.4  | 23.4 | 9.6  | 81.6 |
| New Zealand                        | 20 | 16 | 16.2 | 30.8 | 6.2  | 14.8 | 10.6 | 82.2 |
| Nigeria                            | 44 | 3  | 23.9 | 8.9  | 3.1  | 4.8  | 10.8 | 55.2 |
| North Macedonia                    | 17 | 14 | 28.5 | 22.4 | 9.3  | N/A  | 6.2  | N/A  |
| Norway                             | 18 | 17 | 19.7 | 23.1 | 5.3  | 18.4 | 7.4  | 82.5 |
| Pakistan                           | 35 | 4  | 30.5 | 8.6  | 19.9 | 20.0 | 0.3  | 66.5 |
| Papua New Guinea                   | 36 | 3  | 25.6 | 21.3 | 17.9 | N/A  | 1.4  | 65.9 |
| Peru                               | 26 | 8  | 13.7 | 19.7 | 6.6  | 9.6  | 6.4  | 75.9 |
| Philippines                        | 31 | 5  | 22.6 | 6.4  | 7.1  | 24.3 | 6.9  | 69.3 |
| Poland                             | 15 | 18 | 28.7 | 23.1 | 6.1  | 26.0 | 11.7 | 77.7 |
| Portugal                           | 13 | 22 | 24.4 | 20.8 | 9.8  | 27.9 | 12.0 | 81.4 |
| Republic of Korea                  | 13 | 14 | 11.0 | 4.7  | 6.9  | 22.0 | 9.7  | 82.7 |
| Republic of Moldova                | 16 | 11 | 29.8 | 18.9 | 5.7  | 25.3 | 11.4 | 71.5 |
| Romania                            | 16 | 18 | 30.0 | 22.5 | 6.9  | 25.5 | 11.7 | 75.2 |
| Russian Federation                 | 18 | 15 | 27.2 | 23.1 | 6.1  | 28.3 | 11.2 | 72.0 |
| Saudi Arabia                       | 25 | 3  | 23.3 | 35.4 | 15.8 | 16.6 | 0.2  | 74.8 |
| Serbia                             | 16 | 18 | 29.5 | 21.5 | 9.0  | 40.6 | 8.7  | 76.3 |
| Singapore                          | 12 | 11 | 14.6 | 6.1  | 2.4  | 16.5 | 2.0  | 82.9 |
| Slovakia                           | 15 | 16 | 28.5 | 20.5 | 6.5  | 32.3 | 11.1 | 77.4 |
| Slovenia                           | 15 | 20 | 30.5 | 20.2 | 5.9  | 22.7 | 11.9 | 80.9 |
| South Africa                       | 29 | 5  | 26.9 | 28.3 | 12.7 | 31.4 | 9.5  | 63.6 |
| Spain                              | 15 | 19 | 19.2 | 23.8 | 6.9  | 27.9 | 12.7 | 83.0 |
| Sudan                              | 41 | 4  | N/A  | N/A  | 22.1 | N/A  | 0.5  | 65.1 |
| Sweden                             | 18 | 20 | 19.3 | 20.6 | 4.8  | 28.8 | 8.9  | 82.3 |
| Switzerland                        | 15 | 19 | 18.0 | 19.5 | 5.7  | 25.1 | 11.5 | 83.3 |
| Syrian Arab Republic               | 31 | 5  | 24.5 | 27.8 | 13.5 | N/A  | 0.2  | 63.8 |
| Thailand                           | 17 | 12 | 22.3 | 10.0 | 7.0  | 22.8 | 8.3  | 75.5 |
| Turkey                             | 25 | 8  | 20.3 | 32.1 | 11.1 | 29.3 | 2.0  | 76.4 |
| Uganda                             | 47 | 2  | 27.3 | 5.3  | 2.5  | 9.8  | 15.1 | 62.5 |
| Ukraine                            | 16 | 16 | 27.1 | 24.1 | 6.1  | 25.5 | 8.3  | 72.5 |
| United Arab Emirates               | 15 | 1  | 21.1 | 31.7 | 16.3 | 18.2 | 3.9  | 77.2 |
| United Kingdom                     | 18 | 18 | 15.2 | 27.8 | 3.9  | 19.2 | 11.4 | 81.4 |
| United States of America           | 19 | 16 | 12.9 | 36.2 | 10.8 | 25.1 | 9.9  | 78.6 |
| Venezuela (Bolivarian Republic of) | 28 | 7  | 18.6 | 25.6 | 7.0  | N/A  | 4.1  | 74.1 |
| Viet Nam                           | 23 | 7  | 23.4 | 2.1  | 6.0  | N/A  | 8.7  | 76.3 |

|        |    |   |      |      |     |      |     |      |
|--------|----|---|------|------|-----|------|-----|------|
| Yemen  | 40 | 3 | 30.7 | 17.1 | 5.4 | 20.9 | 0.1 | 65.3 |
| Zambia | 45 | 2 | 27.1 | 8.1  | 4.5 | 14.7 | 6.5 | 62.3 |

---

**Supplementary Table S1.** (Continued)

| Nation                           | Medical-doctor density (/10,000 population) 2010–2018† | Nursing/midwifery-personnel density (/10,000 population) 2010–2018† | GDP per capita, PPP (current international \$) 2018‡ | GNI per capita, PPP (current international \$) 2018‡ | Annual PM2.5 concentrations in urban areas ( $\mu\text{g}/\text{m}^3$ ) 2016† | Daily ambient UV radiation ( $\text{J}/\text{m}^2$ ) 1997–2003§ |
|----------------------------------|--------------------------------------------------------|---------------------------------------------------------------------|------------------------------------------------------|------------------------------------------------------|-------------------------------------------------------------------------------|-----------------------------------------------------------------|
| Albania                          | 12.2                                                   | 36.5                                                                | 13,835.5                                             | 13,820                                               | 18.2                                                                          | 2,542                                                           |
| Argentina                        | 39.9                                                   | 26.0                                                                | 23,300.0                                             | 22,470                                               | 11.7                                                                          | 3,476                                                           |
| Armenia                          | 44.0                                                   | 61.1                                                                | 13,024.7                                             | 13,190                                               | 32.9                                                                          | 2,899                                                           |
| Australia                        | 36.8                                                   | 125.5                                                               | 51,036.4                                             | 49,440                                               | 7.3                                                                           | 3,206                                                           |
| Austria                          | 51.7                                                   | 2.6                                                                 | 56,871.2                                             | 56,720                                               | 13.1                                                                          | 1,888                                                           |
| Bahrain                          | 9.3                                                    | 24.9                                                                | 47,297.0                                             | 44,700                                               | 69.0                                                                          | 4,419                                                           |
| Bangladesh                       | 5.8                                                    | 4.1                                                                 | 4,549.6                                              | 4,760                                                | 58.6                                                                          | 4,029                                                           |
| Belgium                          | 30.7                                                   | 194.6                                                               | 52,254.0                                             | 52,590                                               | 13.0                                                                          | 1,645                                                           |
| Bolivia (Plurinational State of) | 15.9                                                   | 15.6                                                                | 8,866.4                                              | 8,640                                                | 23.3                                                                          | 5,344                                                           |
| Bosnia and Herzegovina           | 21.6                                                   | 57.3                                                                | 14,962.0                                             | 14,920                                               | 29.7                                                                          | 2,205                                                           |
| Brazil                           | 21.6                                                   | 101.2                                                               | 14,951.8                                             | 14,530                                               | 11.8                                                                          | 4,552                                                           |
| Bulgaria                         | 40.3                                                   | 48.2                                                                | 22,304.9                                             | 22,650                                               | 20.8                                                                          | 2,331                                                           |
| Cambodia                         | 1.9                                                    | 6.9                                                                 | 4,261.8                                              | 3,970                                                | 24.9                                                                          | 5,152                                                           |
| Cameroon                         | 0.9                                                    | 0.1                                                                 | 3,691.3                                              | 3,610                                                | 65.4                                                                          | 5,185                                                           |
| Canada                           | 23.1                                                   | 99.4                                                                | 49,994.1                                             | 49,430                                               | 6.7                                                                           | 1,887                                                           |
| Chile                            | 25.9                                                   | 133.2                                                               | 24,763.0                                             | 23,750                                               | 23.1                                                                          | 3,982                                                           |
| China                            | 19.8                                                   | 26.6                                                                | 15,376.2                                             | 15,320                                               | 51.0                                                                          | 2,908                                                           |
| Colombia                         | 21.8                                                   | 13.3                                                                | 14,834.4                                             | 15,320                                               | 17.2                                                                          | 5,385                                                           |
| Croatia                          | 30.0                                                   | 81.2                                                                | 28,115.5                                             | 27,700                                               | 17.6                                                                          | 1,976                                                           |
| Cuba                             | 84.2                                                   | 75.6                                                                | N/A                                                  | N/A                                                  | 21.6                                                                          | 4,401                                                           |
| Cyprus                           | 19.5                                                   | 52.5                                                                | 38,513.3                                             | 39,880                                               | 17.1                                                                          | 3,439                                                           |
| Czechia                          | 41.2                                                   | 84.0                                                                | 40,428.7                                             | 38,180                                               | 15.6                                                                          | 1,707                                                           |
| Democratic Republic of the Congo | 1.6                                                    | 6.3                                                                 | 3,357.6                                              | 3,000                                                | 36.4                                                                          | 4,943                                                           |
| Denmark                          | 40.1                                                   | 103.2                                                               | 57,218.4                                             | 57,980                                               | 10.3                                                                          | 1,691                                                           |
| Dominican Republic               | 15.3                                                   | 13.8                                                                | 18,143.2                                             | 17,330                                               | 13.3                                                                          | 4,880                                                           |
| Ecuador                          | 20.4                                                   | 25.1                                                                | 11,853.7                                             | 11,530                                               | 15.5                                                                          | 4,929                                                           |
| Egypt                            | 4.5                                                    | 19.3                                                                | 11,643.2                                             | 11,350                                               | 79.6                                                                          | 4,202                                                           |
| El Salvador                      | 15.7                                                   | 18.3                                                                | 8,816.6                                              | 8,320                                                | 23.8                                                                          | 5,364                                                           |
| Estonia                          | 44.8                                                   | 111.6                                                               | 36,358.0                                             | 35,340                                               | 7.0                                                                           | 1,781                                                           |
| Ethiopia                         | 0.8                                                    | 7.1                                                                 | 2,154.4                                              | 2,140                                                | 34.0                                                                          | 5,929                                                           |
| Fiji                             | 8.6                                                    | 33.8                                                                | 14,144.4                                             | 13,180                                               | 10.5                                                                          | 4,431                                                           |
| Finland                          | 38.1                                                   | 147.4                                                               | 49,549.4                                             | 49,720                                               | 6.5                                                                           | 1,494                                                           |
| France                           | 32.7                                                   | 114.7                                                               | 46,447.4                                             | 47,490                                               | 12.4                                                                          | 1,907                                                           |
| Germany                          | 42.5                                                   | 132.4                                                               | 54,456.9                                             | 55,980                                               | 11.9                                                                          | 1,812                                                           |
| Ghana                            | 1.4                                                    | 42.0                                                                | 5,321.0                                              | 5,220                                                | 31.1                                                                          | 5,166                                                           |
| Greece                           | 54.8                                                   | 36.3                                                                | 30,357.6                                             | 30,430                                               | 16.4                                                                          | 2,753                                                           |
| Guinea                           | 0.8                                                    | 1.2                                                                 | 2,555.9                                              | 2,510                                                | 22.2                                                                          | 5,391                                                           |
| Honduras                         | 3.1                                                    | 7.4                                                                 | 5,810.4                                              | 5,350                                                | 21.5                                                                          | 4,924                                                           |
| Hungary                          | 34.1                                                   | 69.2                                                                | 31,578.8                                             | 30,310                                               | 16.3                                                                          | 1,932                                                           |
| Iceland                          | 40.8                                                   | 162.1                                                               | 58,058.2                                             | 55,920                                               | 5.9                                                                           | 957                                                             |
| India                            | 8.6                                                    | 17.3                                                                | 6,697.2                                              | 6,630                                                | 68.0                                                                          | 4,514                                                           |
| Indonesia                        | 4.3                                                    | 24.1                                                                | 11,646.5                                             | 11,290                                               | 16.4                                                                          | 5,220                                                           |
| Iran (Islamic Republic of)       | 15.8                                                   | 4.4                                                                 | 14,535.9                                             | 14,560                                               | 34.4                                                                          | 4,038                                                           |
| Iraq                             | 7.1                                                    | 20.4                                                                | 10,919.9                                             | 10,780                                               | 60.1                                                                          | 3,825                                                           |
| Ireland                          | 33.1                                                   | 161.0                                                               | 84,459.8                                             | 68,060                                               | 8.7                                                                           | 1,509                                                           |
| Israel                           | 46.2                                                   | 3.3                                                                 | 40,261.3                                             | 40,280                                               | 19.4                                                                          | 3,682                                                           |
| Italy                            | 39.8                                                   | 57.4                                                                | 42,798.1                                             | 43,260                                               | 15.7                                                                          | 2,444                                                           |

|                                    |      |       |           |        |      |       |
|------------------------------------|------|-------|-----------|--------|------|-------|
| Jamaica                            | 13.1 | 8.1   | 9,975.2   | 9,520  | 13.6 | 4,942 |
| Japan                              | 24.1 | 121.5 | 41,473.3  | 43,010 | 11.8 | 2,521 |
| Kazakhstan                         | 39.8 | 72.9  | 26,172.4  | 22,950 | 14.5 | 2,257 |
| Kenya                              | 1.6  | 11.7  | 4,294.9   | 4,260  | 25.8 | 5,803 |
| Latvia                             | 31.9 | 47.5  | 30,744.8  | 30,220 | 14.4 | 1,671 |
| Lebanon                            | 21.0 | 16.7  | 16,416.9  | 16,330 | 30.7 | 2,953 |
| Libya                              | 20.9 | 65.3  | 14,423.3  | 14,820 | 41.7 | 3,861 |
| Lithuania                          | 63.5 | 98.5  | 35,831.9  | 34,680 | 12.3 | 1,801 |
| Luxembourg                         | 30.1 | 121.7 | 116,786.5 | 74,400 | 10.4 | 1,687 |
| Malaysia                           | 15.4 | 34.7  | 28,207.7  | 27,200 | 17.3 | 5,225 |
| Mauritania                         | 1.9  | 9.3   | 3,802.9   | 3,770  | 41.7 | 5,547 |
| Mauritius                          | 25.3 | 35.2  | 22,752.2  | 24,980 | 13.5 | 5,055 |
| Mexico                             | 23.8 | 24.0  | 20,396.5  | 19,870 | 20.9 | 4,974 |
| Mongolia                           | 28.6 | 38.9  | 12,203.5  | 11,050 | 49.5 | 2,226 |
| Morocco                            | 7.3  | 13.9  | 8,611.7   | 8,430  | 31.1 | 3,568 |
| Myanmar                            | 6.8  | 10.0  | 4,996.0   | 4,860  | 34.6 | 4,565 |
| Nepal                              | 7.5  | 31.1  | 3,330.6   | 3,360  | 99.5 | 4,130 |
| Netherlands                        | 36.1 | 111.8 | 57,565.2  | 58,140 | 12.1 | 1,662 |
| New Zealand                        | 35.9 | 124.5 | 42,193.8  | 40,550 | 5.8  | 2,487 |
| Nigeria                            | 3.8  | 11.8  | 5,281.4   | 5,040  | 46.3 | 5,251 |
| North Macedonia                    | 28.7 | 37.9  | 16,624.9  | 15,930 | 33.0 | N/A   |
| Norway                             | 29.2 | 182.2 | 67,640.2  | 70,530 | 7.8  | 1,439 |
| Pakistan                           | 9.8  | 6.7   | 4,854.9   | 29,160 | 56.2 | 4,227 |
| Papua New Guinea                   | 0.7  | 4.5   | 4,336.2   | 4,220  | 11.5 | 5,377 |
| Peru                               | 13.0 | 24.4  | 13,093.7  | 12,450 | 29.0 | 5,906 |
| Philippines                        | 6.0  | 49.4  | 8,321.2   | 9,980  | 18.7 | 4,928 |
| Poland                             | 23.8 | 68.9  | 31,755.8  | 30,410 | 21.5 | 1,749 |
| Portugal                           | 51.2 | 69.7  | 34,272.0  | 33,520 | 8.1  | 2,585 |
| Republic of Korea                  | 23.6 | 73.0  | 39,660.9  | 39,630 | 24.7 | 2,535 |
| Republic of Moldova                | 32.1 | 49.2  | 12,564.9  | 13,170 | 16.5 | 1,910 |
| Romania                            | 29.8 | 73.9  | 29,061.3  | 28,350 | 15.4 | 2,403 |
| Russian Federation                 | 37.5 | 85.4  | 28,556.3  | 27,840 | 14.7 | 2,071 |
| Saudi Arabia                       | 26.1 | 54.8  | 48,756.2  | 49,200 | 86.7 | 4,422 |
| Serbia                             | 31.1 | 60.9  | 17,617.0  | 16,710 | 24.7 | N/A   |
| Singapore                          | 22.9 | 62.4  | 98,827.4  | 92,150 | 18.3 | 5,087 |
| Slovakia                           | 34.2 | 3.2   | 32,616.6  | 31,960 | 18.0 | 3,979 |
| Slovenia                           | 30.9 | 99.7  | 38,749.3  | 31,960 | 16.4 | 1,795 |
| South Africa                       | 9.1  | 13.1  | 12,938.4  | 12,530 | 24.3 | 5,773 |
| Spain                              | 38.7 | 57.3  | 40,483.6  | 40,570 | 9.8  | 2,705 |
| Sudan                              | 2.6  | 7.0   | 4,767.7   | 4,430  | 46.8 | 5,783 |
| Sweden                             | 39.8 | 118.2 | 53,807.9  | 54,640 | 6.1  | 1,587 |
| Switzerland                        | 43.0 | 175.4 | 69,366.4  | 70,140 | 10.4 | 2,158 |
| Syrian Arab Republic               | 12.9 | 15.4  | N/A       | N/A    | 37.4 | 3,501 |
| Thailand                           | 8.1  | 27.6  | 18,481.9  | 17,650 | 26.6 | 4,862 |
| Turkey                             | 18.5 | 27.1  | 28,139.1  | 27,710 | 41.2 | 2,924 |
| Uganda                             | 1.7  | 12.4  | 1,837.2   | 1,780  | 48.7 | 5,499 |
| Ukraine                            | 29.9 | 66.6  | 9,249.5   | 9,030  | 19.4 | 1,843 |
| United Arab Emirates               | 25.3 | 57.3  | 67,549.6  | 67,870 | 37.2 | 4,862 |
| United Kingdom                     | 28.1 | 81.7  | 46,867.9  | 46,240 | 10.6 | 1,576 |
| United States of America           | 26.1 | 145.5 | 62,886.8  | 63,780 | 7.6  | 2,736 |
| Venezuela (Bolivarian Republic of) | N/A  | 9.4   | N/A       | N/A    | 16.8 | 5,211 |
| Viet Nam                           | 8.3  | 14.5  | 7,771.2   | 7,230  | 30.1 | 4,293 |



|        |      |      |         |       |      |       |
|--------|------|------|---------|-------|------|-------|
| Yemen  | 5.3  | 7.9  | N/A     | N/A   | 44.3 | 6,089 |
| Zambia | 11.9 | 13.4 | 3,599.0 | 3,500 | 23.8 | 5,265 |

GDP, Gross Domestic Product; GNI, Gross National Income; N/A, not available; PM2.5, particulate matter 2.5; PPP, Purchasing Power Parity; UV, ultraviolet.

\*Coronavirus disease (COVID-2019) situation reports (<https://www.who.int/emergencies/diseases/novel-coronavirus-2019/situation-reports/>), WHO [World Health Organization].

†World Health Statistics 2020: Monitoring health for the SDGs [Sustainable Development Goals] ([https://www.who.int/gho/publications/world\\_health\\_statistics/2020/en/](https://www.who.int/gho/publications/world_health_statistics/2020/en/)), WHO.

‡Agriculture & Rural Development (<https://data.worldbank.org/indicator/>), World Bank.

§Exposure to solar ultraviolet (UV) radiation Data by country (<https://apps.who.int/gho/data/view.main.35300>), WHO.
